# Supplementary figures and images for: High BRAF variant allele frequencies are associated with distinct pathological features and responsiveness to target therapy in melanoma patients
Source: PubMed Central journal article supplement — ESMO Open. 2021 May 10;6(3):100133. doi: 10.1016/j.esmoop.2021.100133 (PMC8134716; doi:10.1016/j.esmoop.2021.100133), 2021-05-10

A

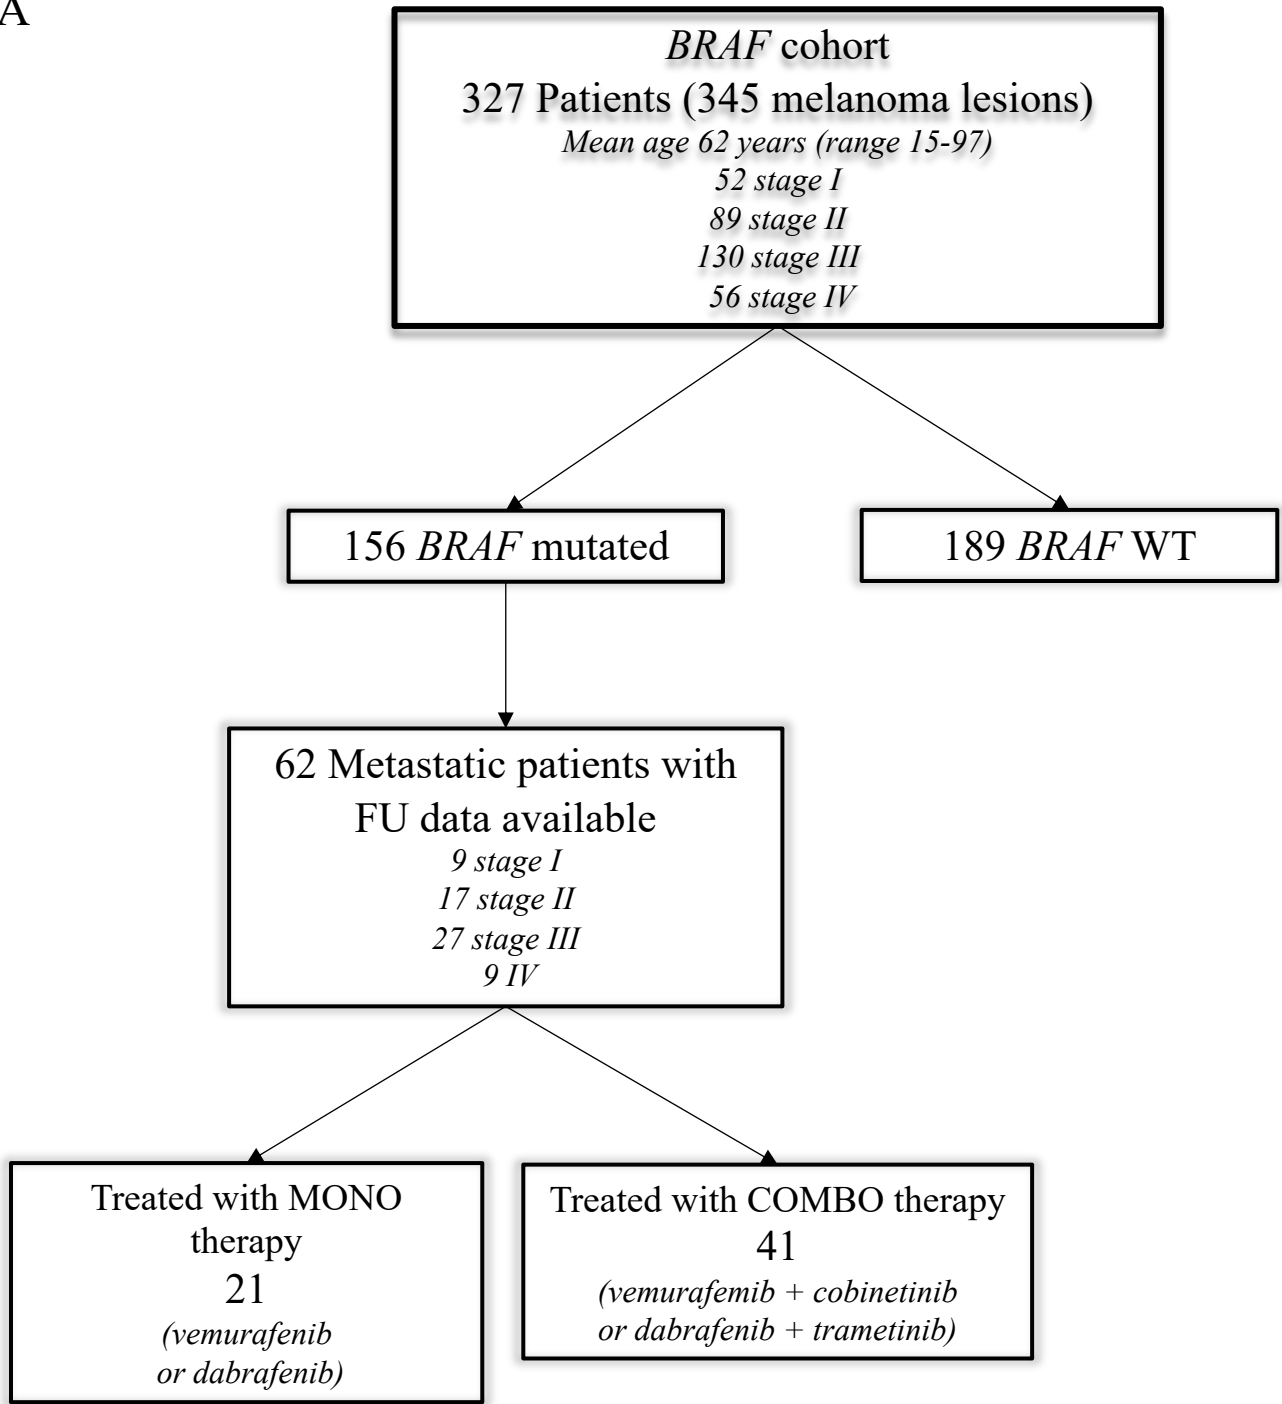

B

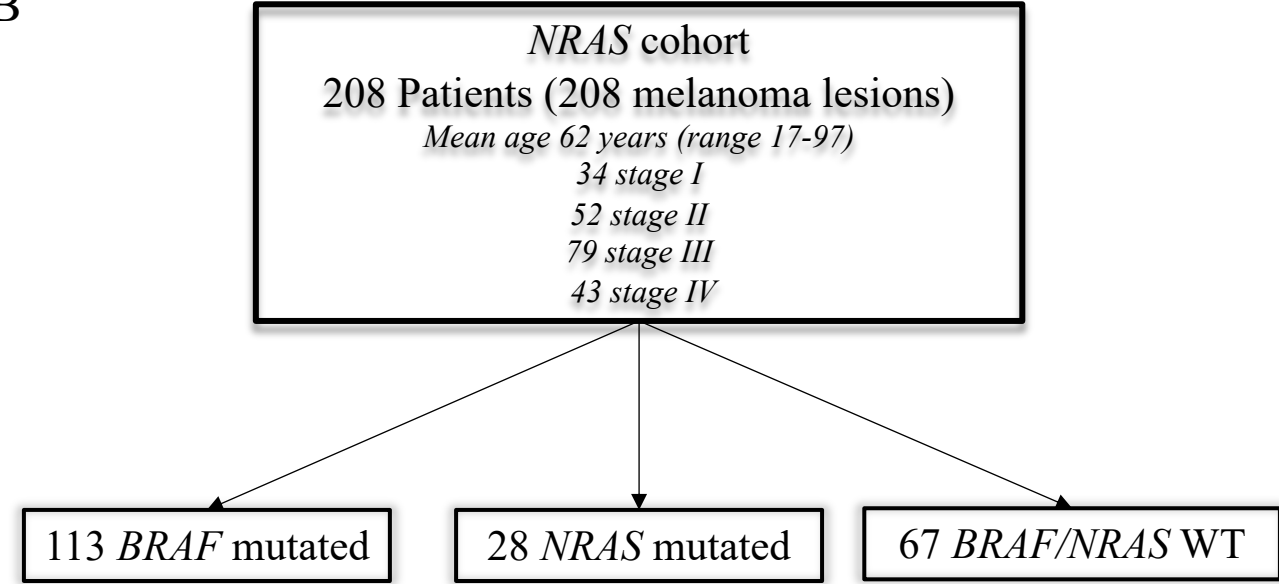

Supplement: mmc2.pdf [file mmc2.pdf]

A

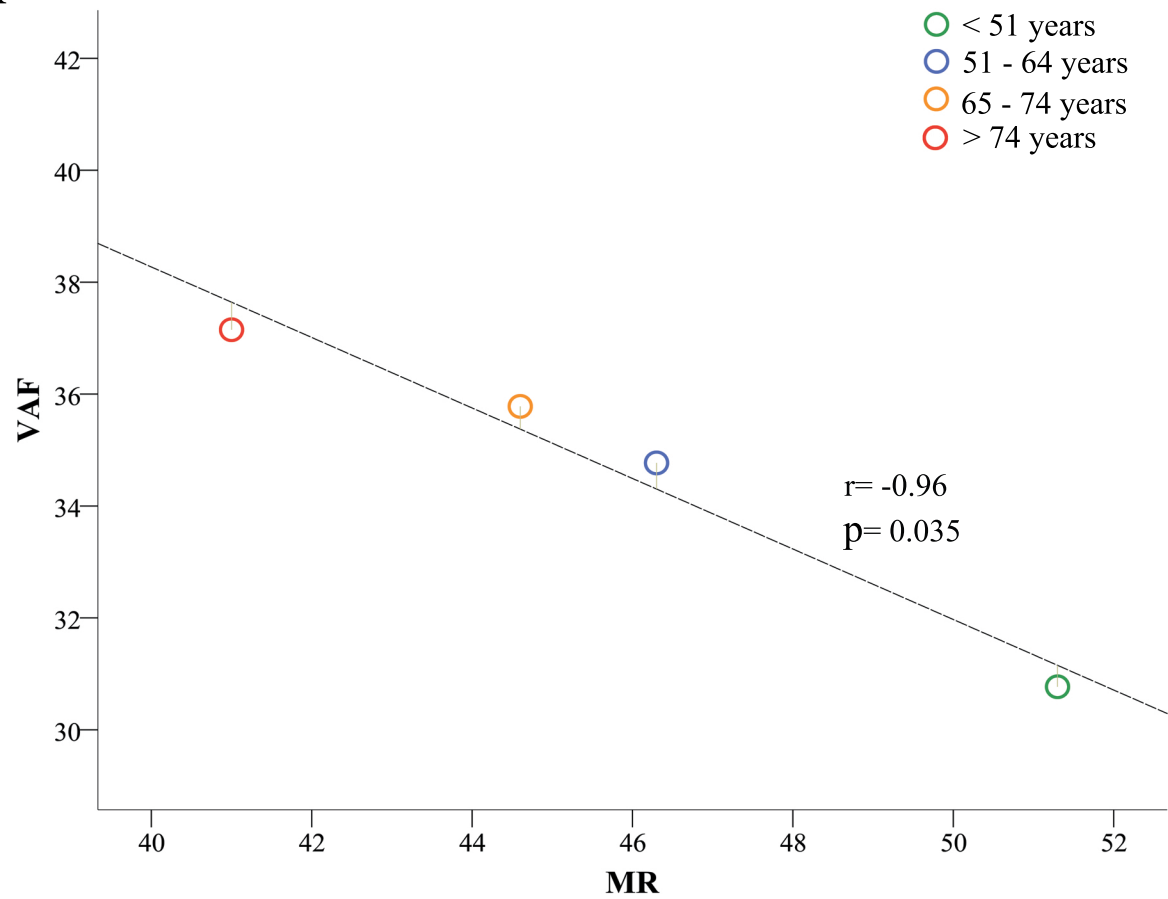

B

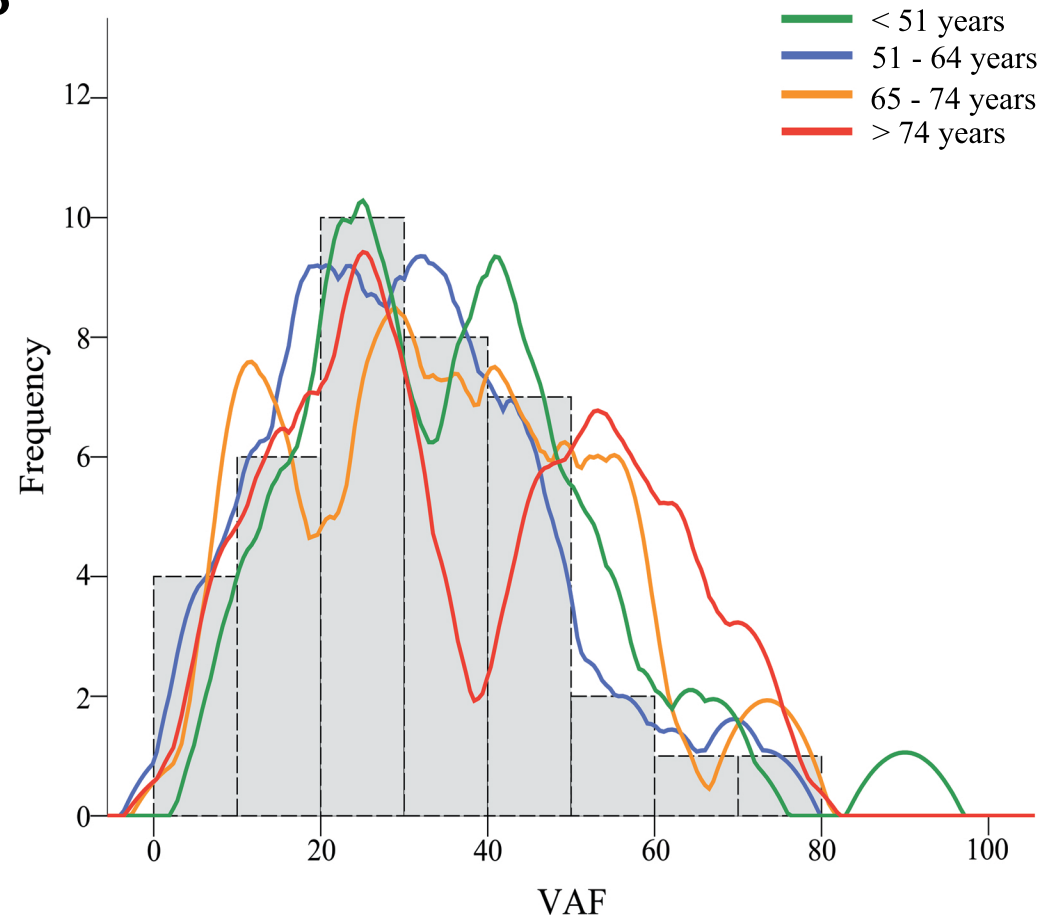

Supplement: mmc3.pdf [file mmc3.pdf]

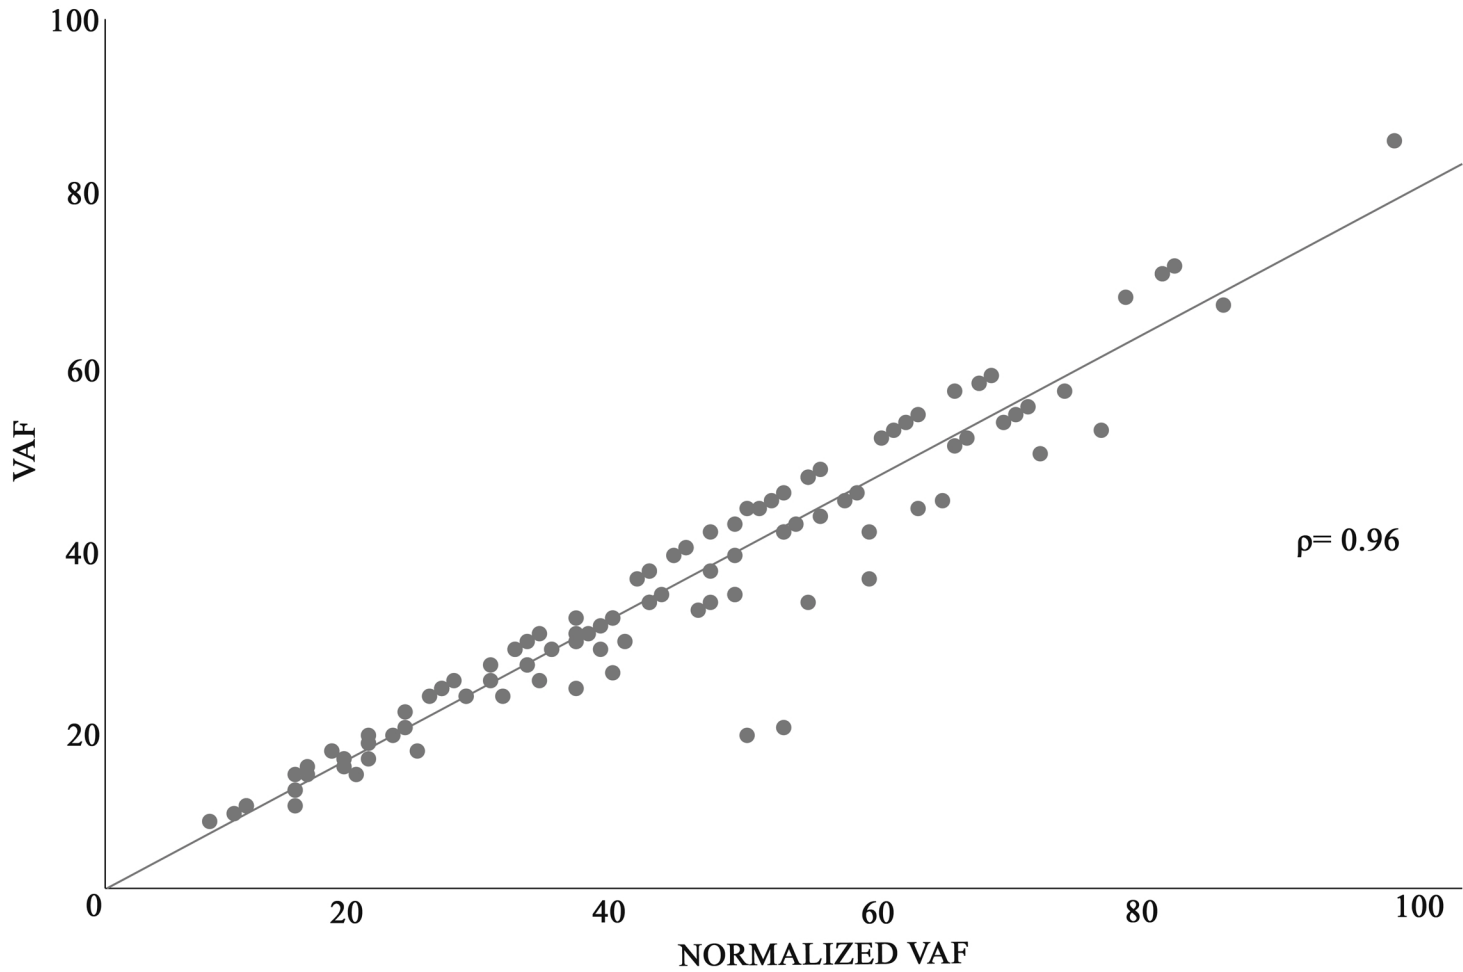

Supplement: mmc4.pdf [file mmc4.pdf]

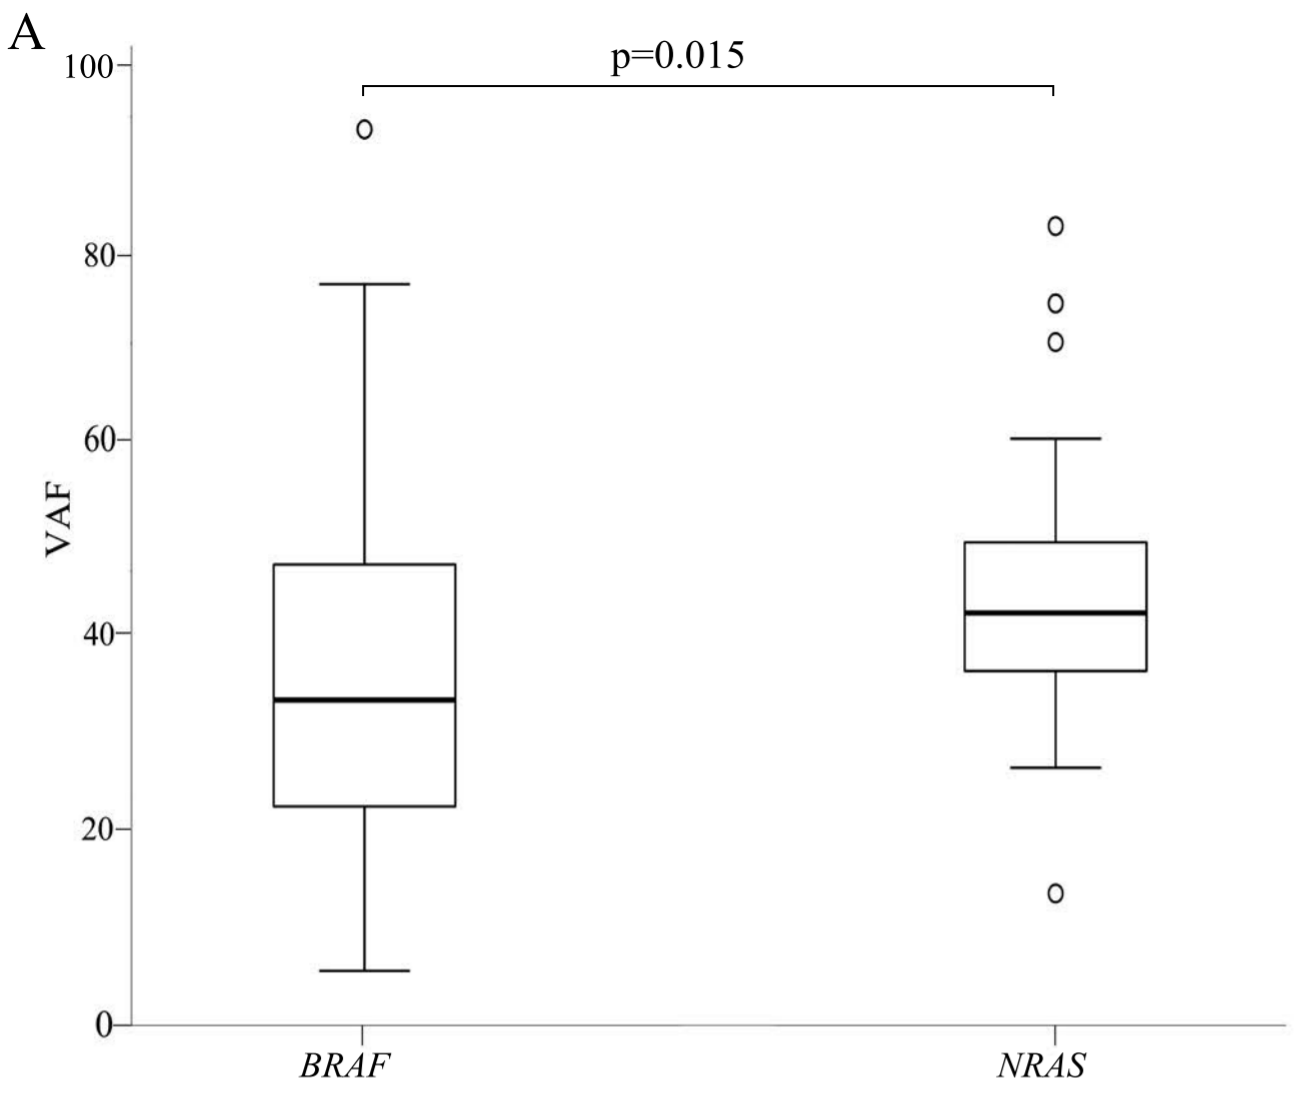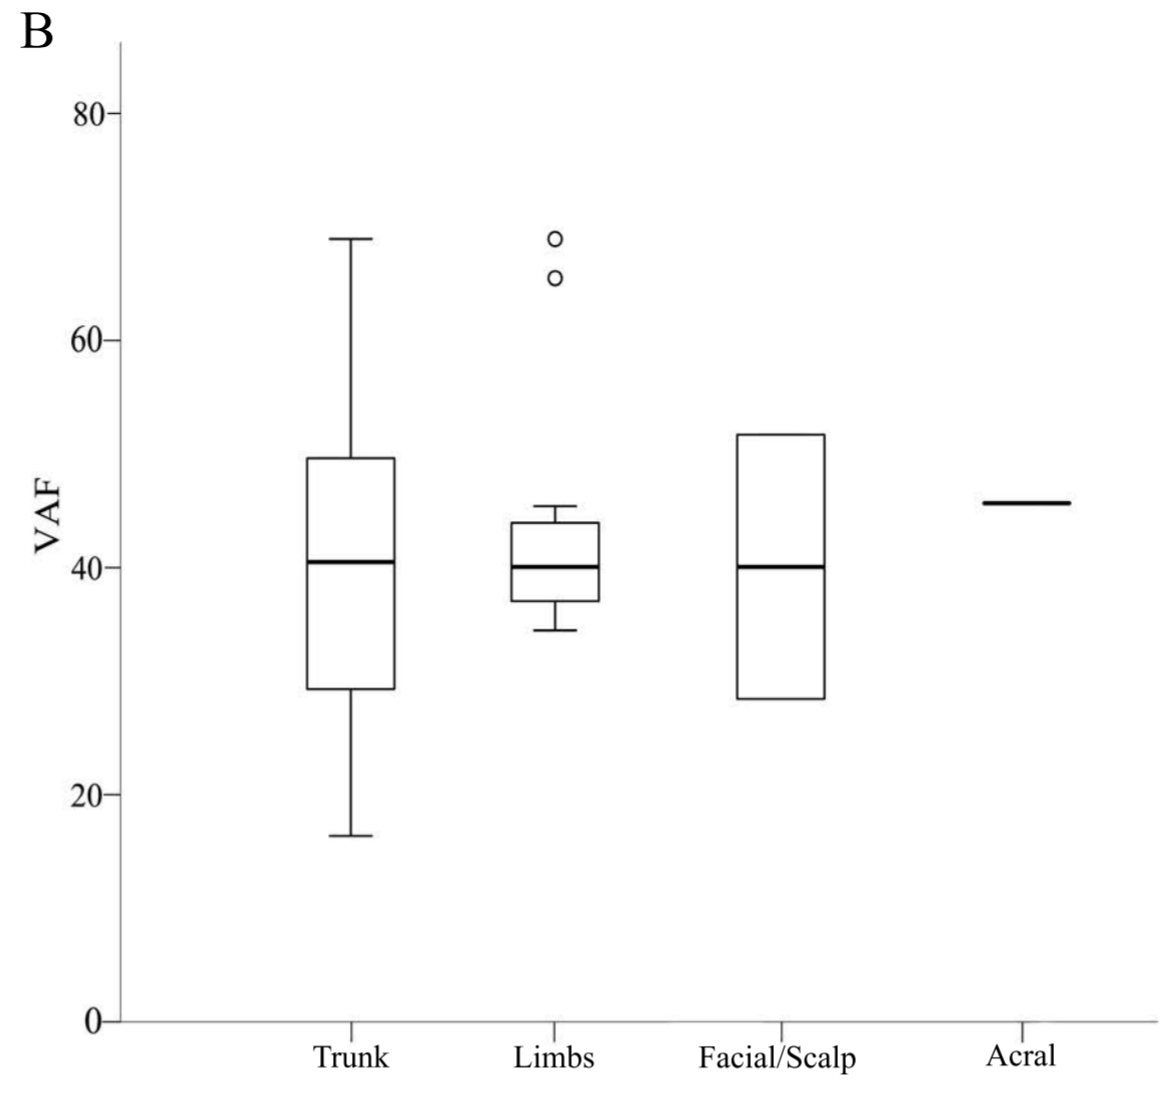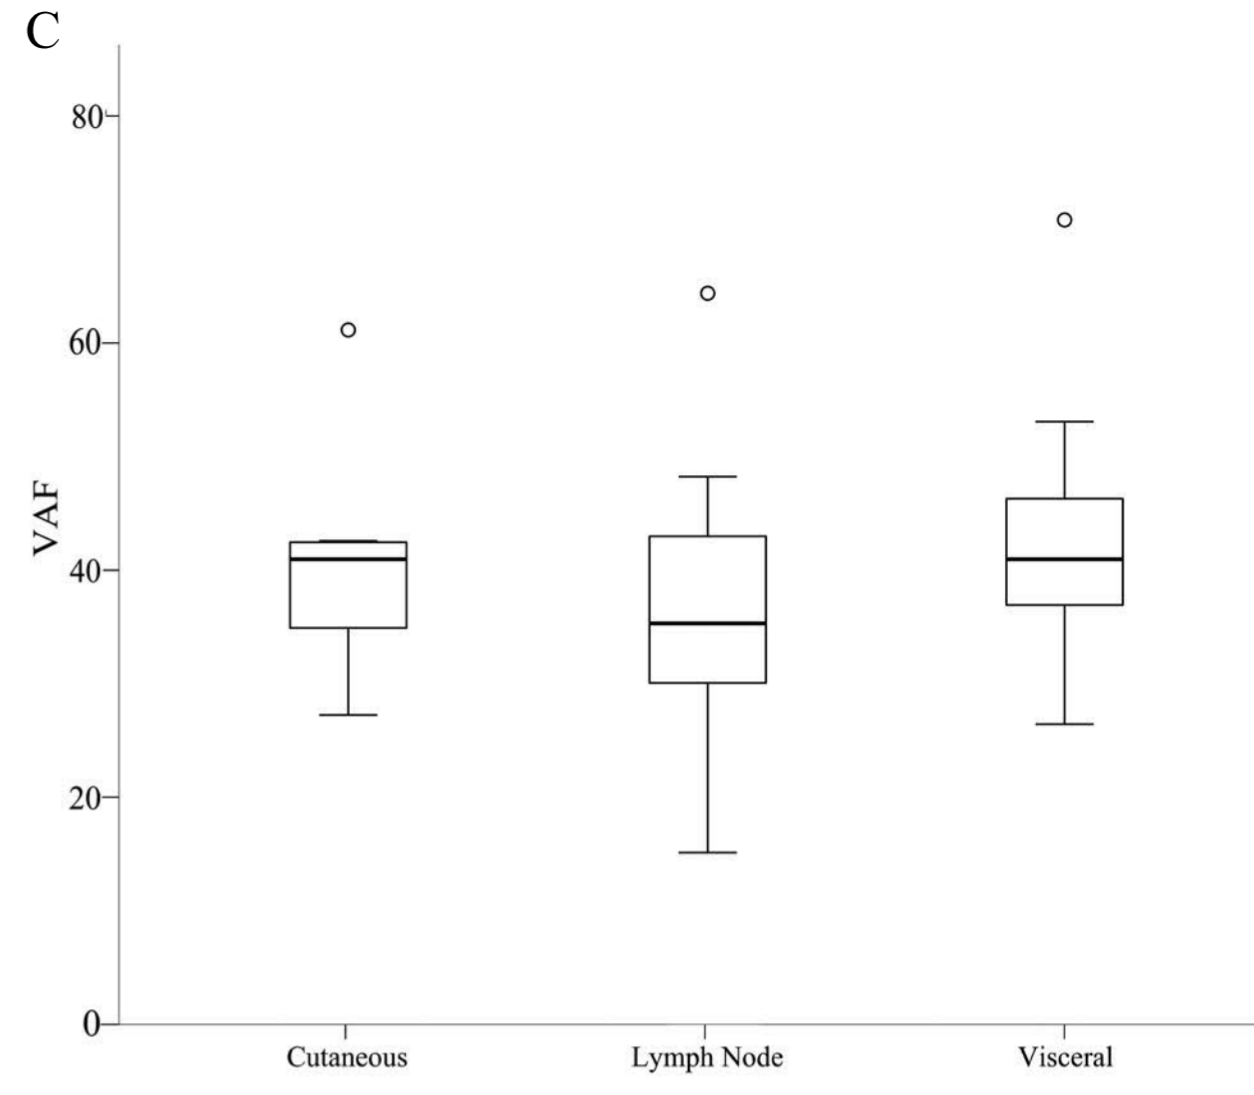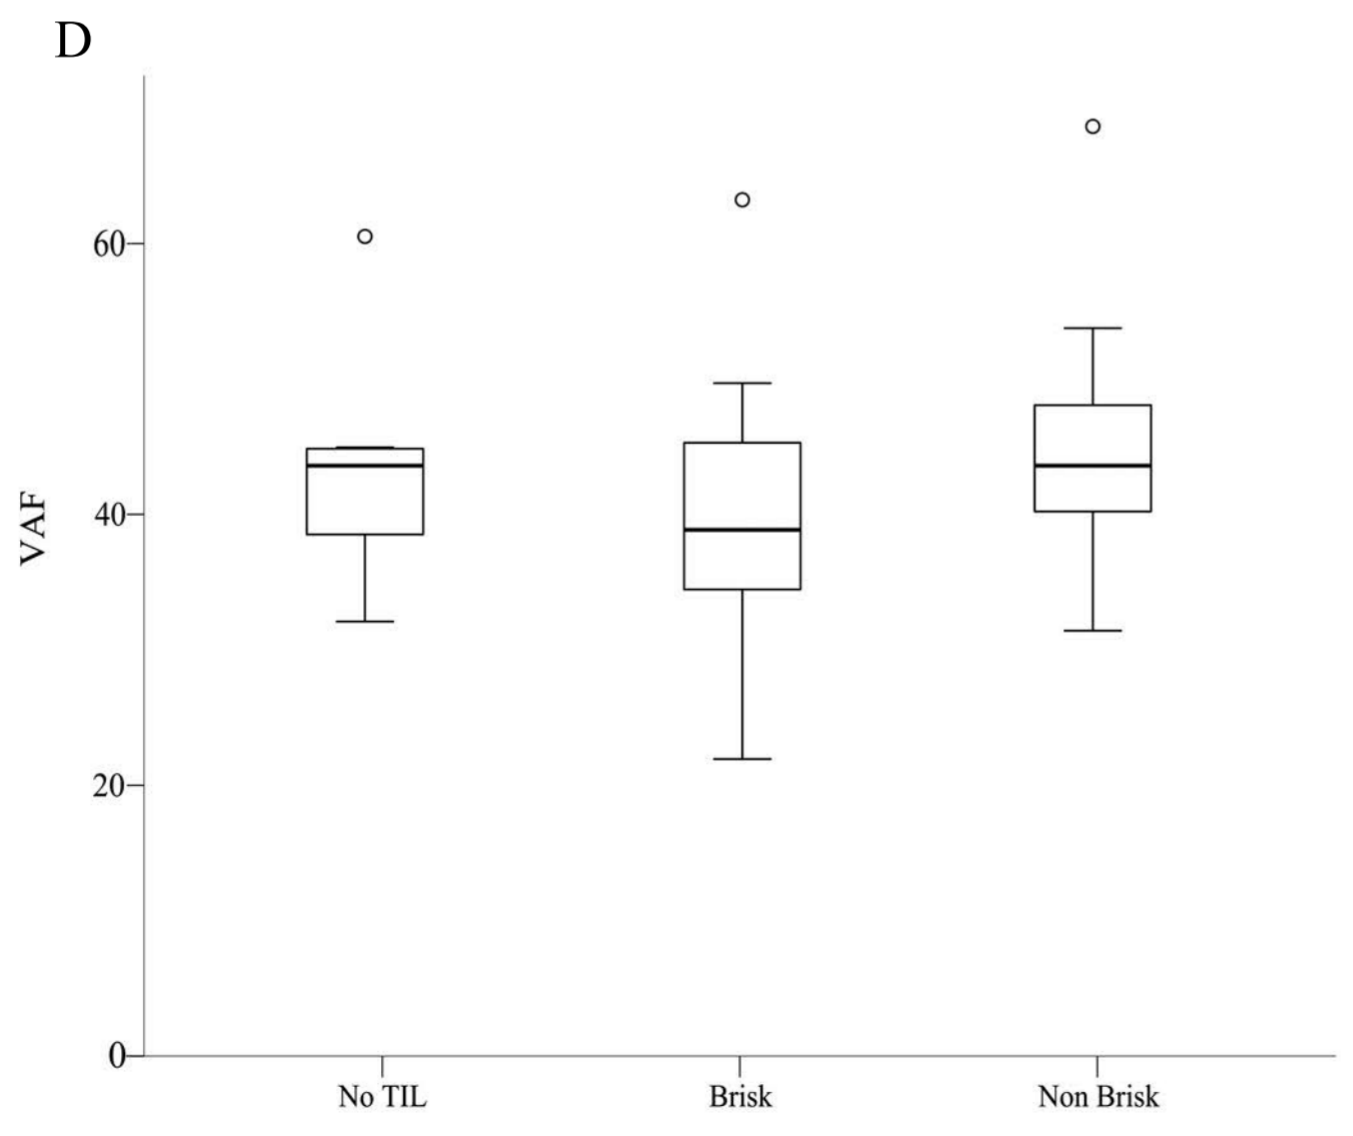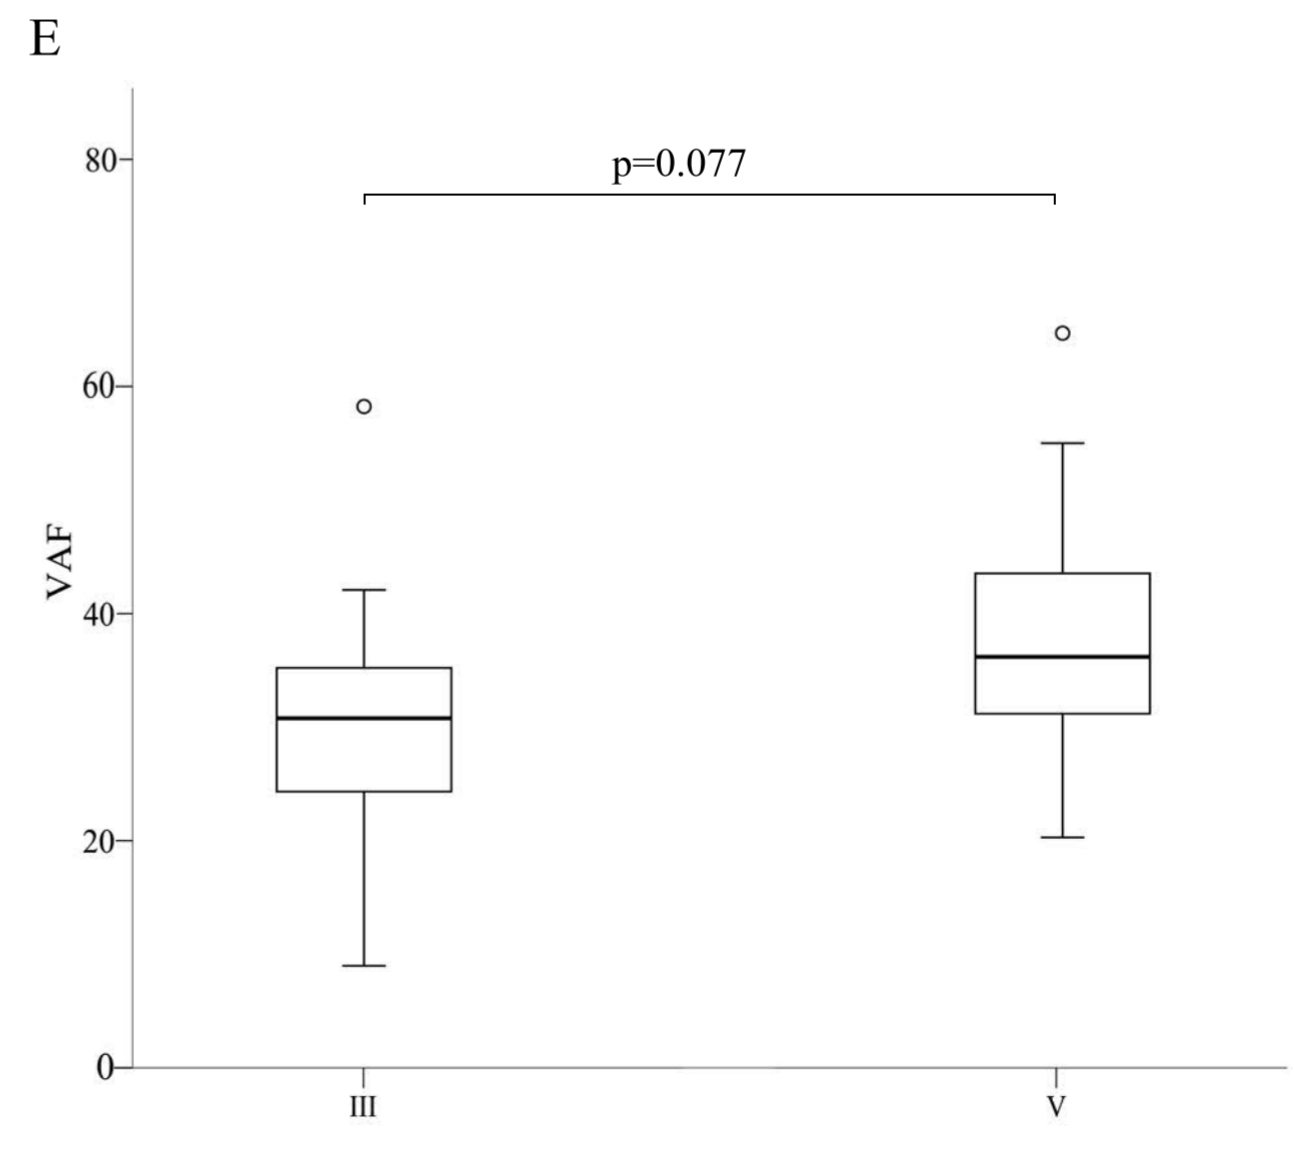

Supplement: mmc5.pdf [file mmc5.pdf]

A

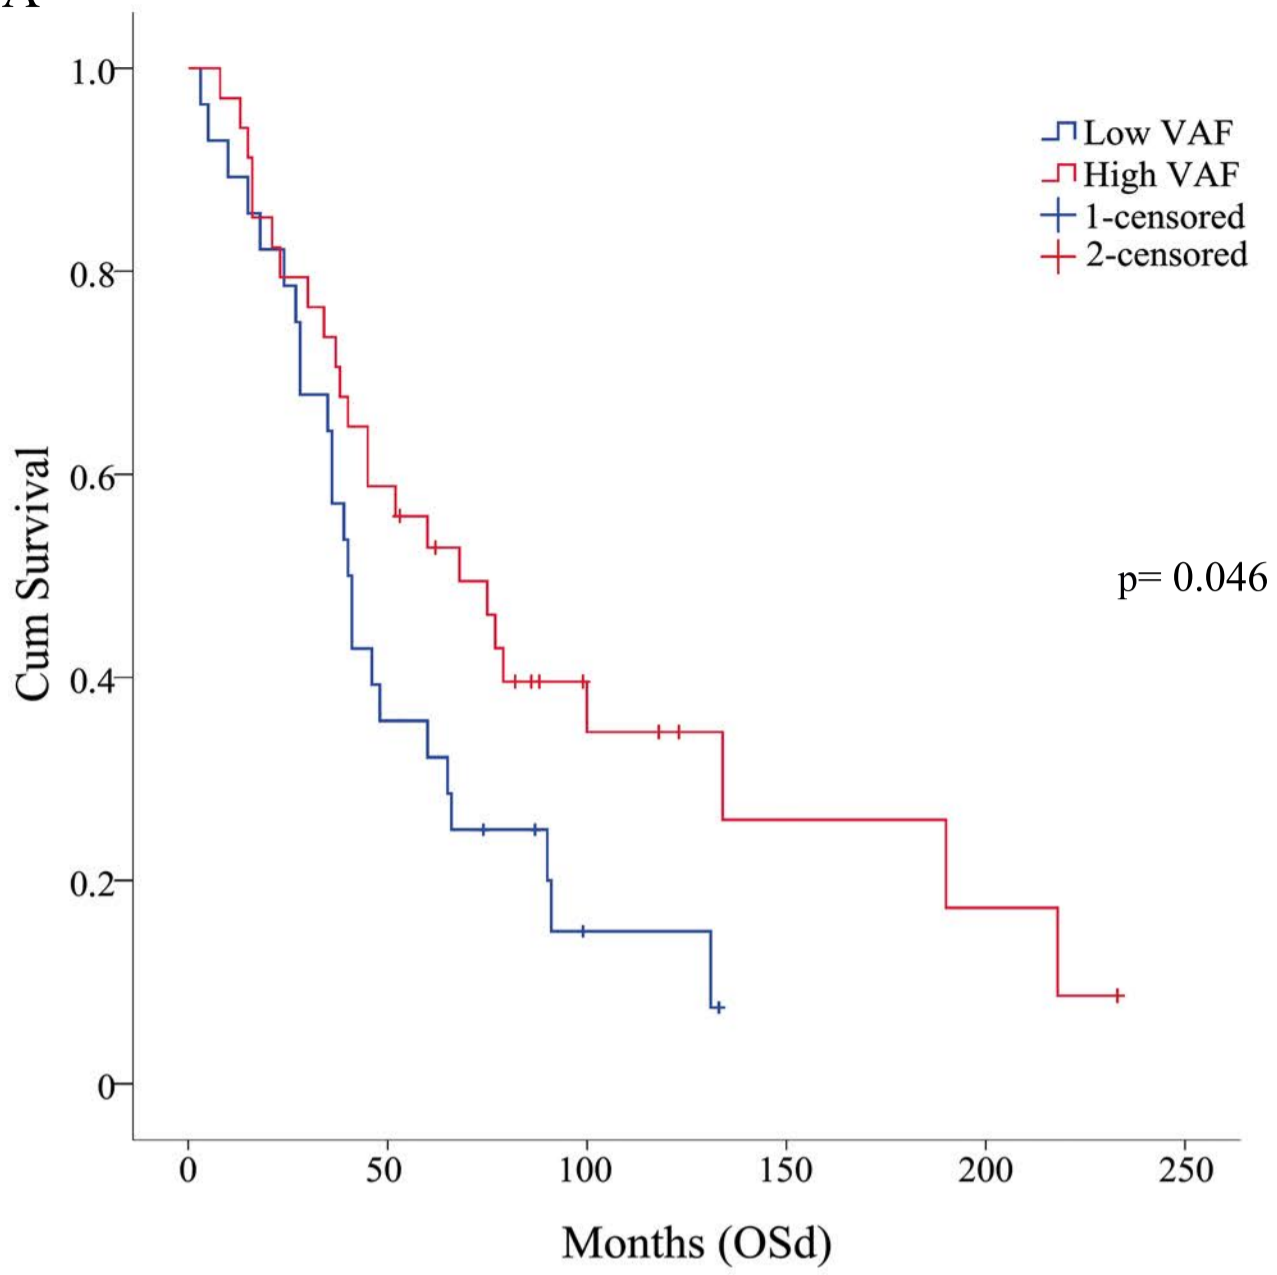

B

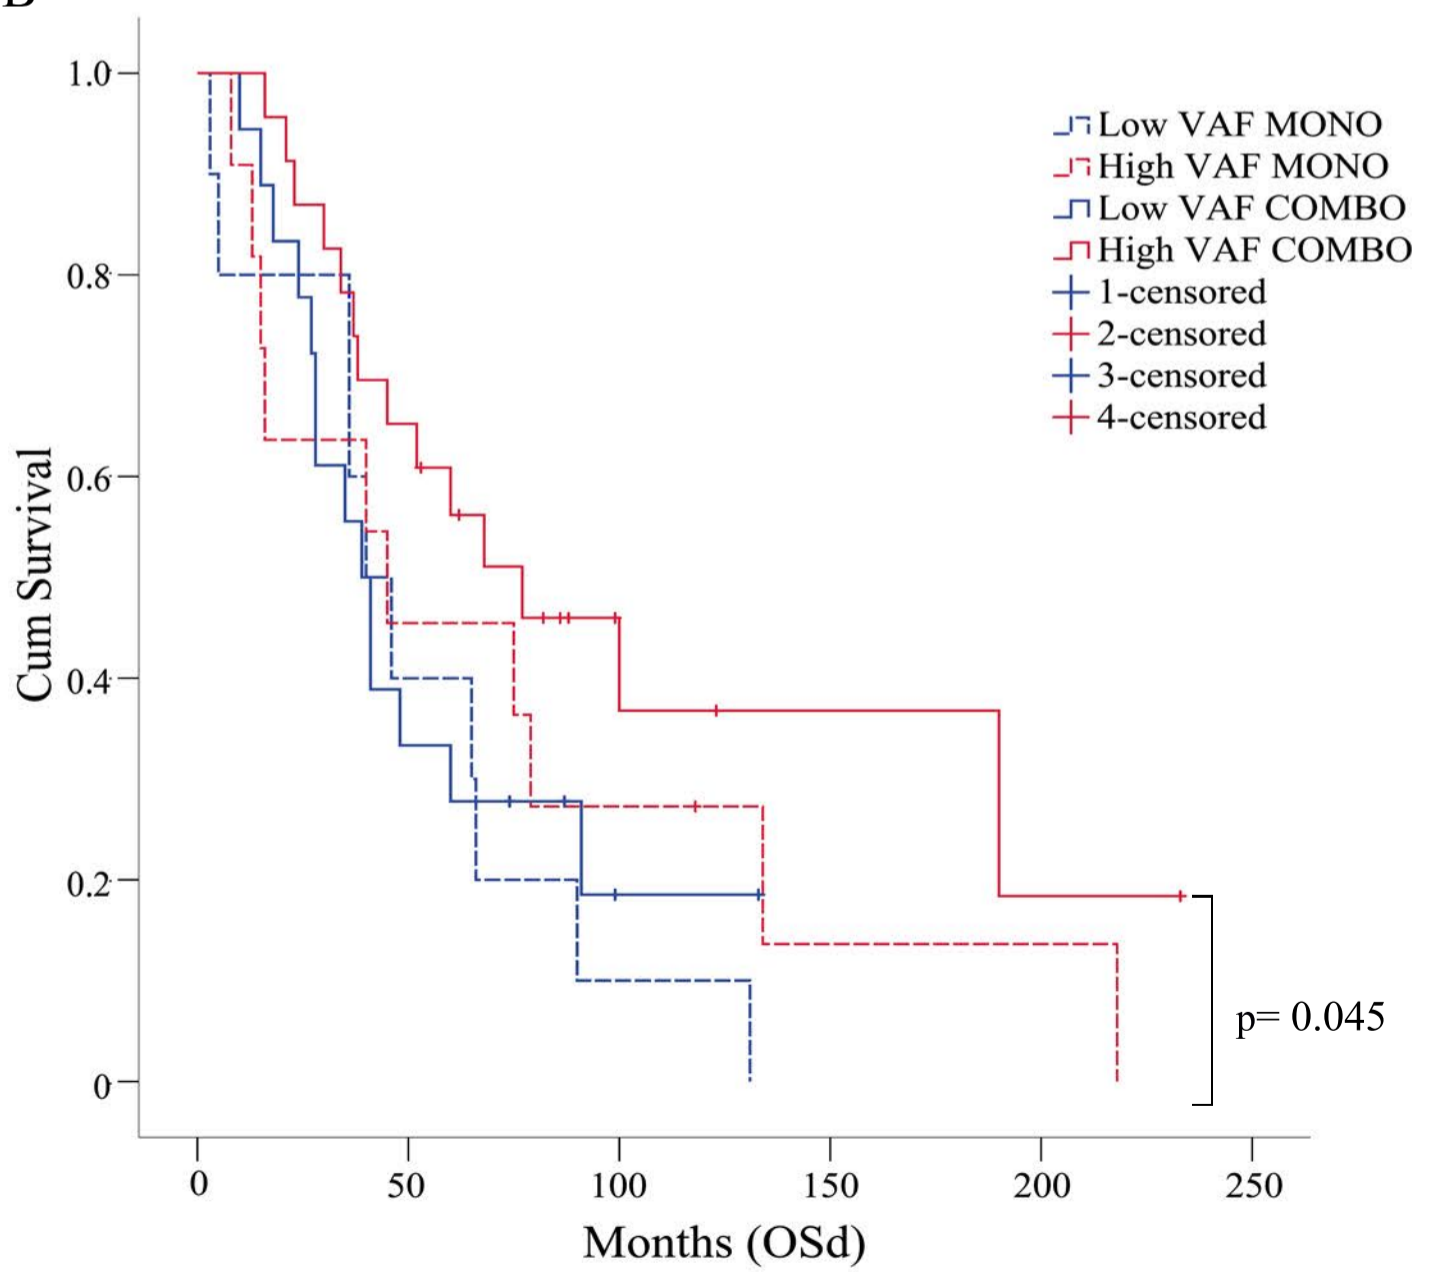

Supplement: mmc6.pdf [file mmc6.pdf]
